# Supplementary material
Source: HighWire-hosted journal article supplement (doi:10.1101/rna.072264.119)
Supplement: Supplemental_FigS1.pdf [file Supplemental_FigS1.pdf]

Ago2-miR122-v1

FlagTag ~ 5' uGGAGUGUgacaGCGGcgaag 3'

target-1-4nt-bridge

3' aauCCUCACAaaaaCGCC 5'

Ago2-miR122-v2

HaloTag ~ 5' uGGAGUGUgacaCUAUCgaag 3'

target-2-10nt-bridge

3' aauCCUCACAaaaaaaaaaGAUA 5'

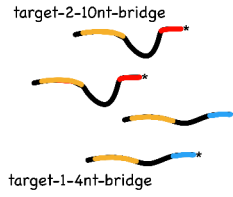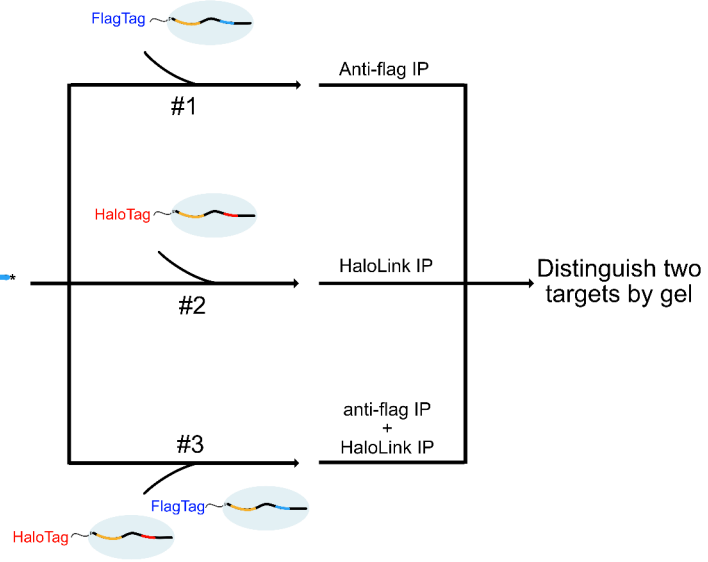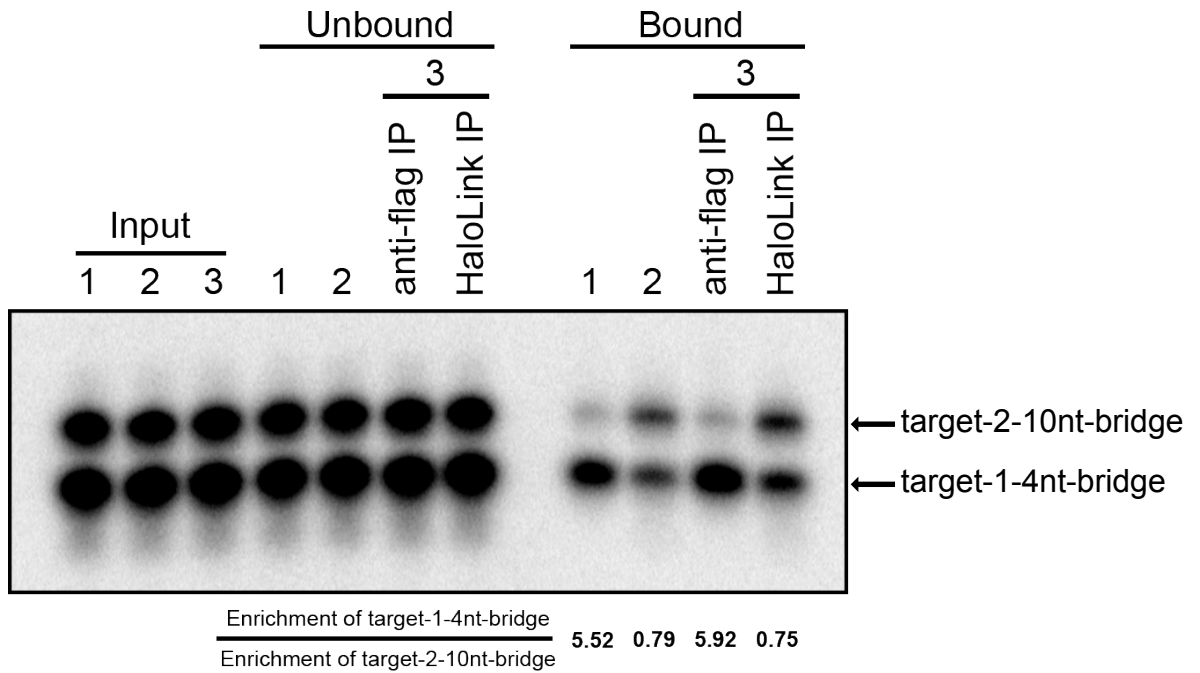

Ago2-miR122-v1 = Ago2-miR122-v2 = 10nM  
 target-1-4nt-bridge = target-2-10nt-bridge = 100nM

Fig. S1
