# Supplementary material
Source: HighWire-hosted journal article supplement (doi:10.1101/rna.072264.119)
Supplement: Supplemental_FigS3.pdf [file Supplemental_FigS3.pdf]

**A** Ago2-miR122-v1 + target-1

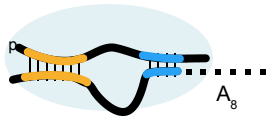

**K<sub>d</sub>**  
 —●— target-1 0.0056±0.0005 nM  
 —○— target-1-A<sub>8</sub> 0.0061±0.0005 nM

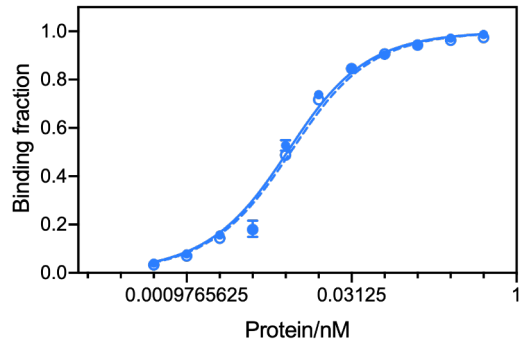

**B**  
**k<sub>on</sub>**  
 —●— target-1 10.59±0.72 nM<sup>-1</sup> min<sup>-1</sup>  
 —○— target-1-A<sub>8</sub> 12.23±1.30 nM<sup>-1</sup> min<sup>-1</sup>

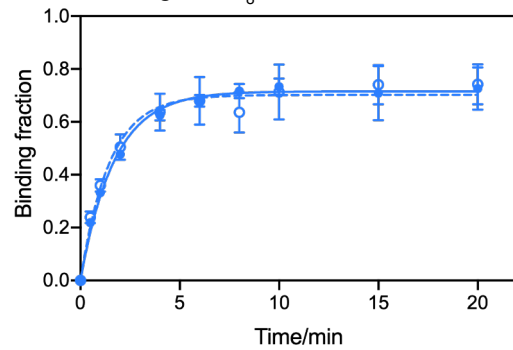

**E** Ago2-miR122-v2 + target-1

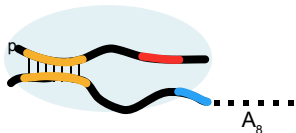

**K<sub>d</sub>**  
 —●— target-1 0.106±0.005 nM  
 —○— target-1-A<sub>8</sub> 0.089±0.005 nM

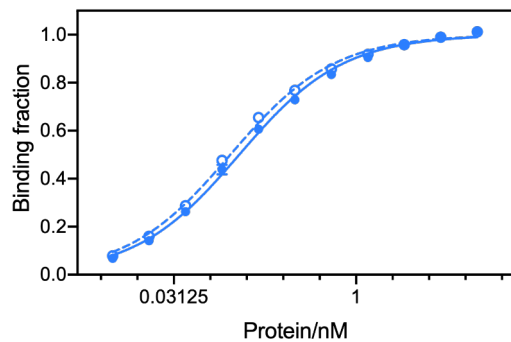

**C** Ago2-miR122-v1 + target-2

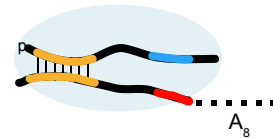

**K<sub>d</sub>**  
 —●— target-2 0.085±0.002 nM  
 —○— target-2-A<sub>8</sub> 0.086±0.002 nM

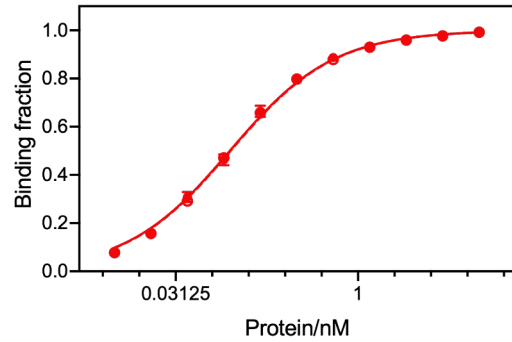

**D**  
**k<sub>on</sub>**  
 —●— target-2 9.63±0.90 nM<sup>-1</sup> min<sup>-1</sup>  
 —○— target-2-A<sub>8</sub> 11.03±0.64 nM<sup>-1</sup> min<sup>-1</sup>

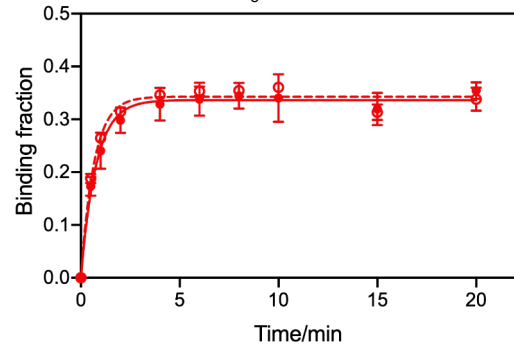

**F** Ago2-miR122-v2 + target-2

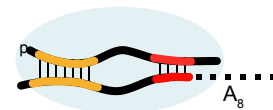

**K<sub>d</sub>**  
 —●— target-2 0.0118±0.0002 nM  
 —○— target-2-A<sub>8</sub> 0.0193±0.0006 nM

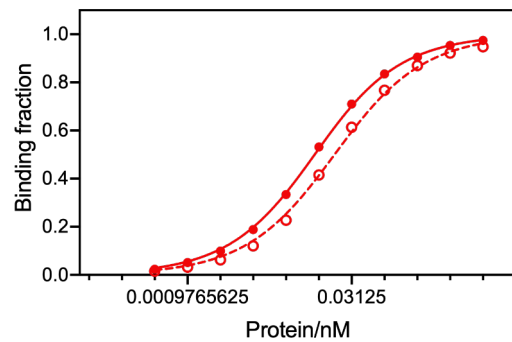

Fig.S3
