# Supplementary material
Source: HighWire-hosted journal article supplement (doi:10.1101/rna.072264.119)
Supplement: Supplemental_FigS5.pdf [file Supplemental_FigS5.pdf]

A

| S1                |    |      |     |     |     | S2                |     |       |     |     |      |
|-------------------|----|------|-----|-----|-----|-------------------|-----|-------|-----|-----|------|
| Group-I           | #1 | #2   | ... | #11 | #12 | Group-I           | #1  | #2    | ... | #11 | #12  |
| Ago2-miR122-v2/nM | 1  | 1    | ... | 1   | 1   | Ago2-miR122-v2/nM | 1   | 1     | ... | 1   | 1    |
| target-1/nM       | 0  | 0.12 | ... | 64  | 128 | target-1/nM       | 0   | 0.012 | ... | 6.4 | 12.8 |
| target-2*/nM      | 1  | 1    | ... | 1   | 1   | target-2*/nM      | 0.1 | 0.1   | ... | 0.1 | 0.1  |

  

| S1                |    |      |     |     |     | S2                |     |       |     |     |      |
|-------------------|----|------|-----|-----|-----|-------------------|-----|-------|-----|-----|------|
| Group-II          | #1 | #2   | ... | #11 | #12 | Group-II          | #1  | #2    | ... | #11 | #12  |
| Ago2-miR122-v2/nM | 1  | 1    | ... | 1   | 1   | Ago2-miR122-v2/nM | 1   | 1     | ... | 1   | 1    |
| target-1*/nM      | 0  | 0.12 | ... | 64  | 128 | target-1*/nM      | 0   | 0.012 | ... | 6.4 | 12.8 |
| target-2/nM       | 1  | 1    | ... | 1   | 1   | target-2/nM       | 0.1 | 0.1   | ... | 0.1 | 0.1  |

-Incubate at RT for 2hrs  
 -Apply to filter-binding apparatus  
 -Phosphor imaging and quantification

B

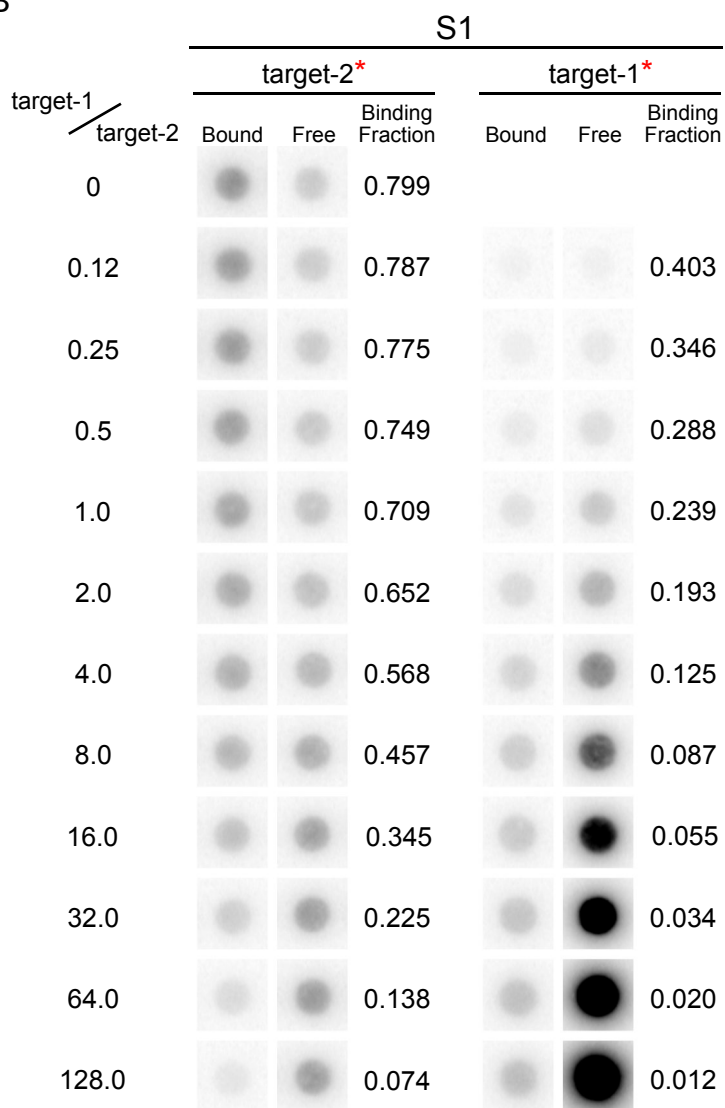

C

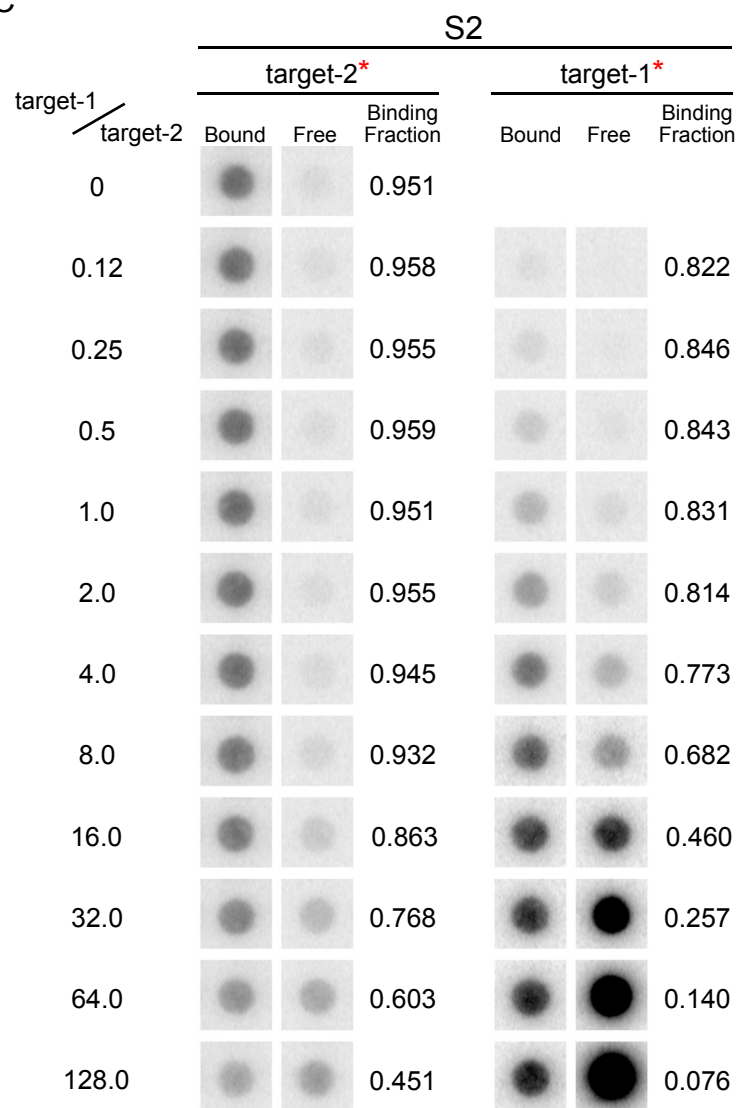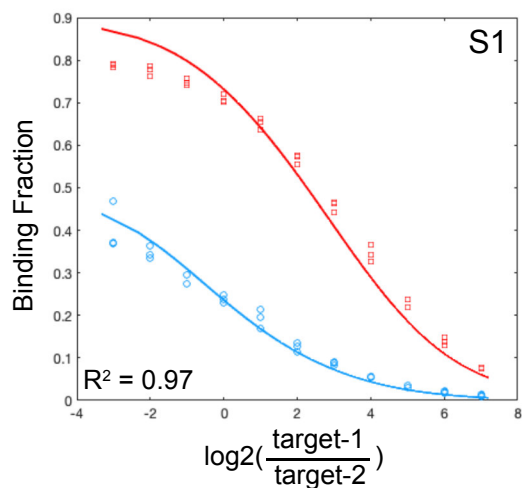

— target-1 binding by prediction  
 ○ target-1 binding by experiment  
 — target-2 binding by prediction  
 □ target-2 binding by experiment

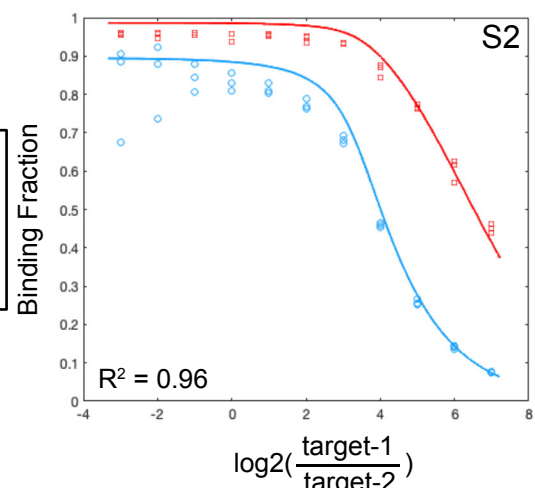

Fig. S5
