# Supplementary material
Source: HighWire-hosted journal article supplement (doi:10.1101/rna.072264.119)
Supplement: Supplemental_FigS6.pdf [file Supplemental_FigS6.pdf]

**Total 170 families with multiple members**

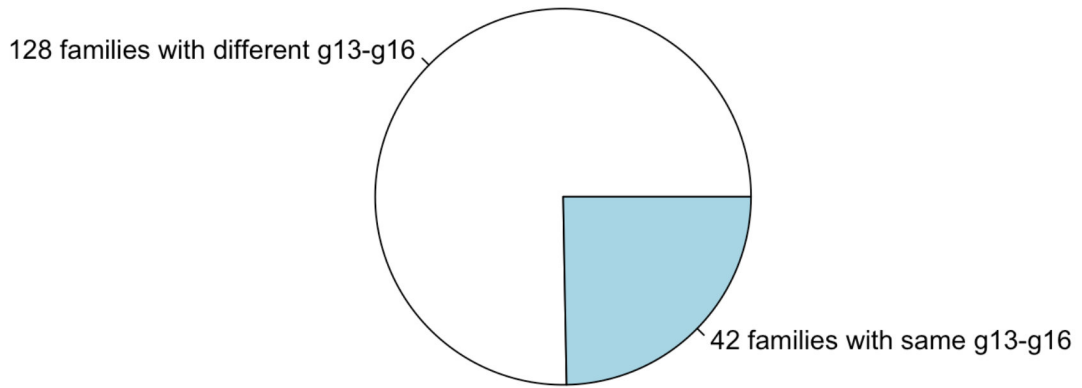

**Total 56 conserved (including broadly conserved) families with multiple members**

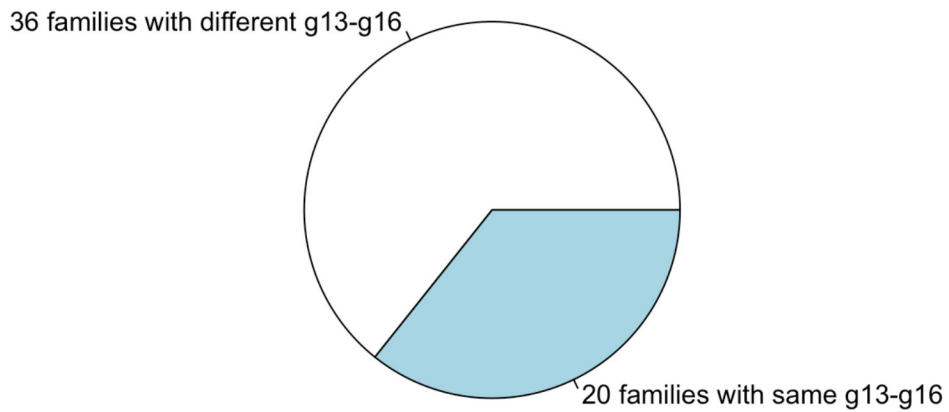

**Total 43 broadly conserved families with multiple members**

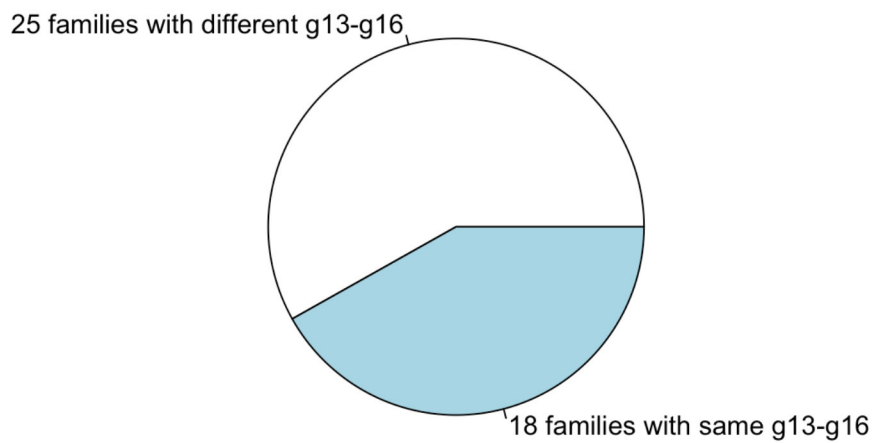

Fig. S6
