# Supplementary material
Source: HighWire-hosted journal article supplement (doi:10.1101/rna.072264.119)
Supplement: Supplemental_Figure_Legends.docx [file Supplemental_Figure_Legends.docx]

**Supplemental Figure Legends**

**Figure S1. Control target pull-down experiment.** Our experimental design required target-1 and target-2 to be different lengths. To control for potential effects of target length in pull-down experiments, we tested two additional targets (target-1-4nt-bridge and target-2-10nt-bridge) in which the bridging regions of target-1 and target-2 were switched. Pull-downs of Ago2-miR122-v1 were substantially enriched for target-1-4nt-bridge, indicating target length per se does not dictate pull-down selectivity. Ago2-miR122-v2 pull-downs showed only a modest enrichment for target-2-10-bridge. This finding is consistent with the previous observation that interactions with the AU-rich supplementary sequence of miR122-v2 are attenuated in targets with extended bridging regions (Sheu-Gruttadauria et al., 2019b). We conclude that pull-down enrichments are reflective of relative target affinities.

**Fig.S2. Time-course distribution of Ago2-miRNA-v2 complex between targets**

1. Flowchart of time-course targets sequestering assays.
2. Ago2-miRNA-v2 distributes between target-1 and target-2 over time. Binding fraction are means of three independent replicates.
3. Quantification result from triplicates of C, data were fit into one-phase decay (Plateau of target-1 = 0.04448; Plateau of target-2 = 0.2273)

Data information: All plotted data are the means of at least three independent replicates. Error bars indicate SD.

**Fig.S3. Kinetic and equilibrium measurements for Ago2-miR122-v1 or v2 binding target-1 or target-2**

1. Top: schematic of Ago2-miR122-v1 paired with target-1 and target-1-A8 (target-1 with an A8 5' extension). Bottom: Bound fraction of target at equilibrium versus Ago-miR122-v1 concentration. Measured Kd values indicated.
2. Association of target-1 (and target-1-A8) with Ago2-miR122-v1 complexes was assessed by monitoring the bound fraction of target RNA as a function of time. Measured kon values indicated.
3. Top: schematic of Ago2-miR122-v1 paired with target-2 and target-2-A8. Bottom: Bound fraction of target at equilibrium versus Ago-miR122-v1 concentration. Measured Kd values indicated.
4. Association of the target-2 (and target-2-A8) with Ago2- miR122-v1 complexes was assessed by monitoring the binding fraction of target RNA as a function of time. Measured kon values indicated.
5. Top: schematic of Ago2-miR122-v2 paired with target-1 and target-1-A8. Bottom: Bound fraction of target at equilibrium versus Ago-miR122-v2 concentration. Measured Kd values indicated.
6. Top: schematic of Ago2-miR122-v2 paired with target-2 and target-2-A8. Bottom: Bound fraction of target at equilibrium versus Ago-miR122-v2 concentration. Measured Kd values indicated.

A8 5' extensions did not substantially impact measured Kd or kon values. All plotted data are the means of at least three independent replicates. Error bars indicate SD.

**Fig.S4. Fold difference between binding fractions of seed+sup target and seed-only target by prediction**

1. The change of the binding fraction ratio of target-1 to target-2 () at equilibrium under S1 for Ago2-miR122-v1, where Ago2-miR122-v1 and target-1 is fixed to 1nM, while target-2 is increasing. X axis is the ratio of target-2 to target-1.
2. The change of the binding fraction ratio of target-1 to target-2 () at equilibrium under S2 for Ago2-miR122-v1, where Ago2-miR122-v1 is 1nM and target-1 is fixed to 0.1nM, while target-2 is increasing. X axis is the ratio of target-2 to target-1.
3. The change of the binding fraction ratio of target-2 to target-1 () at equilibrium under S1 for Ago2-miR122-v2, where Ago2-miR122-v2 and target-2 is fixed to 1nM, while target-1 is increasing. X axis is the ratio of target-1 to target-2.
4. The change of the binding fraction ratio of target-2 to target-1 () at equilibrium under S2 for Ago2-miR122-v2, where Ago2-miR122-v2 is 1nM and target-2 is fixed to 0.1nM, while target-1 is increasing. X axis is the ratio of target-1 to target-2.

**Fig.S5. Test predicted targeting discrimination of Ago2-miR122-v2 by modified filter-binding assay**

1. The design of modified filter-binding assay to evaluate targets sequestering at equilibrium under different concentration of two competing targets.
2. The distribution of Ago2-miR122-v2 between two targets under S1. Theoretical prediction and experimental data are plotted in the same graph for comparison. Note: X axis is plotted as log2() rather than in Fig.4F, in order to let experimental data evenly distribute in the graph.
3. The distribution of Ago2-miR122-v2 between two targets under S2. Theoretical prediction and experimental data are plotted in the same graph for comparison. Note: X axis is plotted as log2() rather than in Fig.4G, in order to let experimental data evenly distribute in the graph.

**Fig.S6. Analysis of human miRNA family**

Raw data (miR Family) was downloaded from TargetScan website (<http://www.targetscan.org/cgi-bin/targetscan/data_download.cgi?db=vert_61>). A subset of human miRNAs info was pulled from raw data, and analyzed for the sequence at miRNA nucleotides 13-16 (g13-g16) by R. R code is provided in supplementary material.

**Fig. S7 Analysis of miRNAs and their expressed target sites in a single cell from published data**

The source data was from Table S1 and S3 from Denzler, McGeary et al., 2016. A, B, C, D, E. Quantification of miR-122, let-7, miR-194, miR-192 and miR-101 and their 7mer (including 7mer-A1 and 7mer-m8 sites) and 8mer sites expressed in hepatocytes. F, G, H, I. Quantification of miR-294, miR-293, miR-92 and miR-16 and their 7mer (including 7mer-A1 and 7mer-m8 sites) and 8mer sites expressed in hepatocytes. The analysis was done by R. Source code is provided in supplementary material.
