# Supplementary material
Source: HighWire-hosted journal article supplement (doi:10.1101/rna.072264.119)
Supplement: Supplemental_Table_S1.docx [file Supplemental_Table_S1.docx]

Table S1

| Targeting complex | parameter | Target-1 | Target-2 |
| --- | --- | --- | --- |
| Ago2-miR-122-v1 | *Kd* | 0.0056 nM | 0.085 nM |
| Ago2-miR-122-v1 | *kon* | 10.59 nM-1 min-1 | 9.55 nM-1 min-1 |
| Ago2-miR-122-v1 | *koff* | 0.059 min-1 | 0.81 min-1 |

*measured value*

*calculated value*
