# Supplementary material
Source: HighWire-hosted journal article supplement (doi:10.1101/rna.072264.119)

A

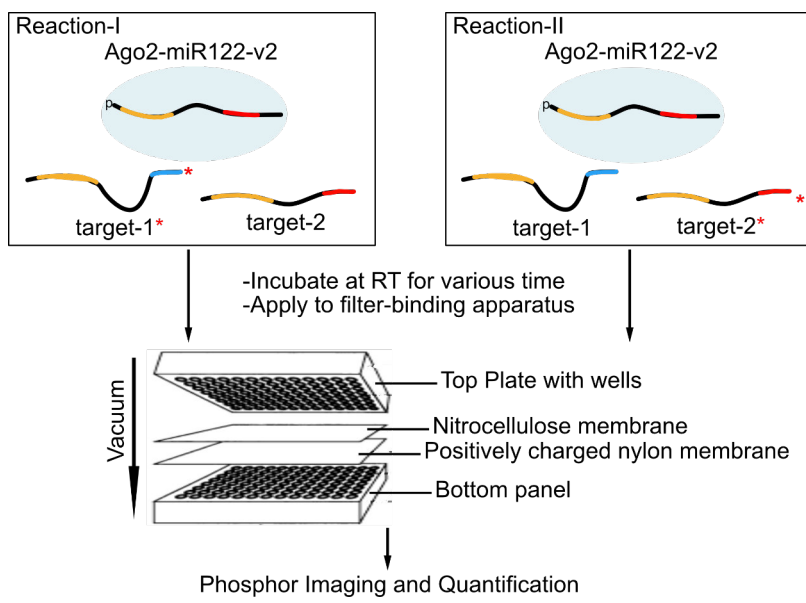

B

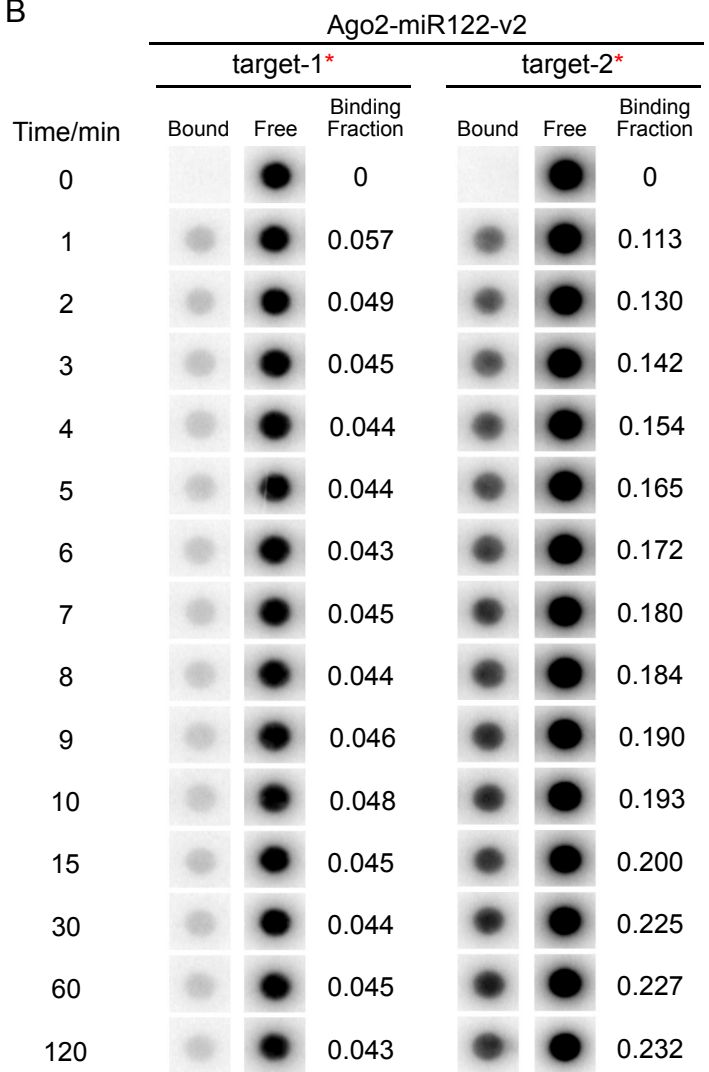

C

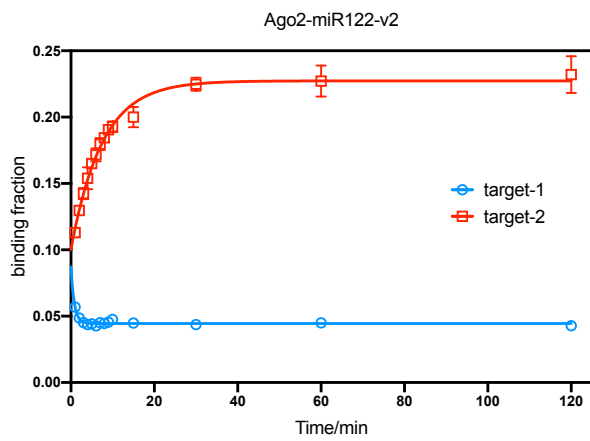

Fig.S2

Supplement: Supplemental_FigS2.pdf [file Supplemental_FigS2.pdf]

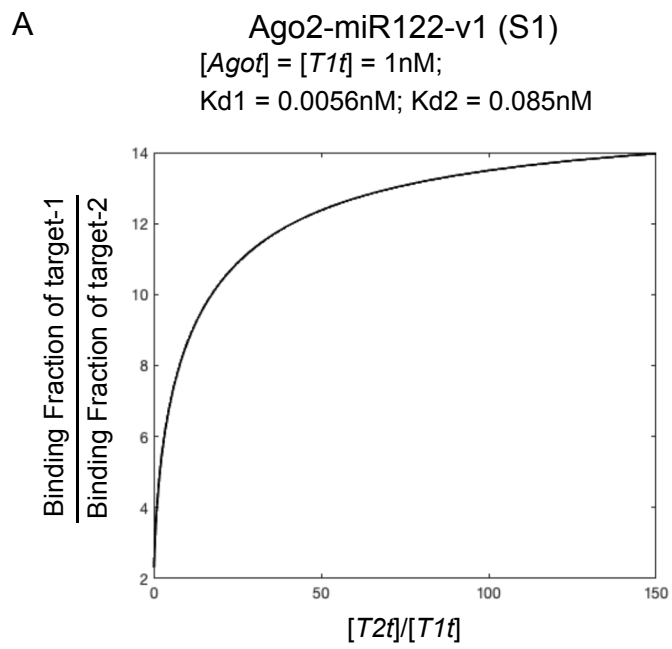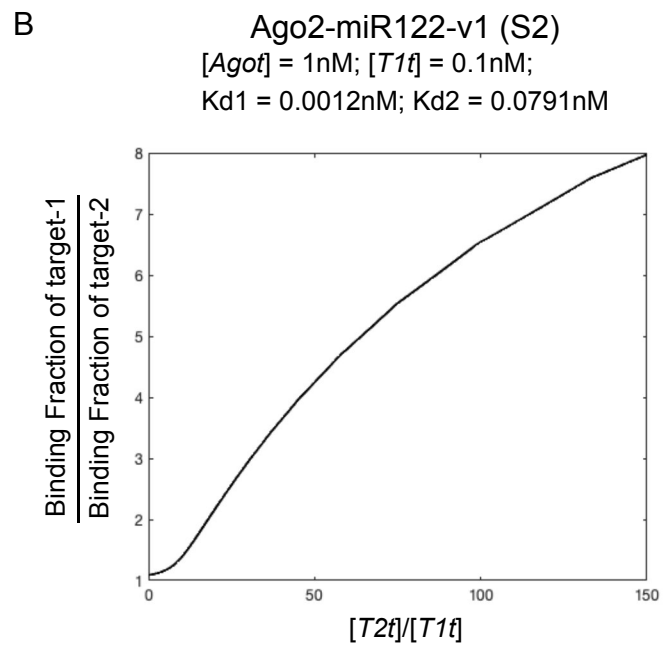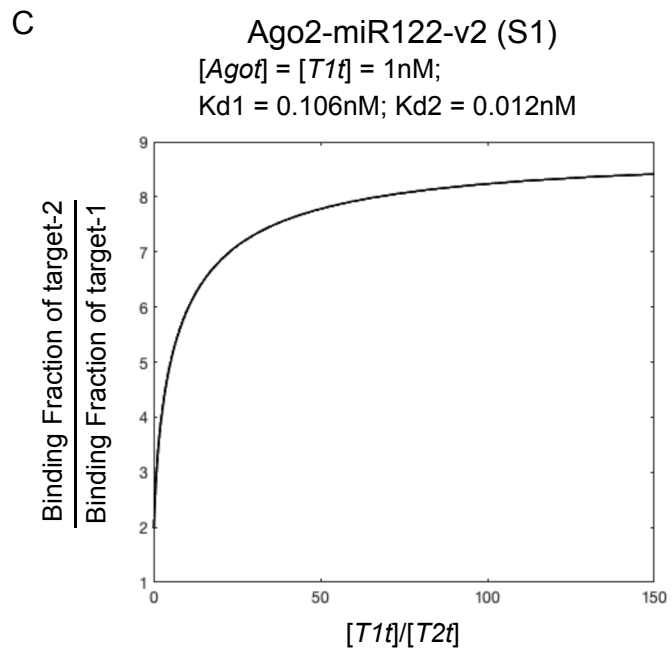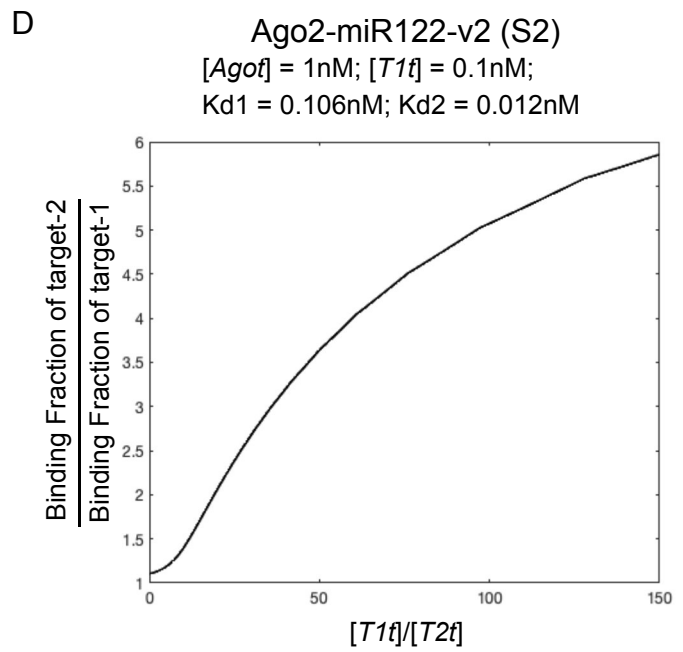

Fig.S4

Supplement: Supplemental_FigS4.pdf [file Supplemental_FigS4.pdf]

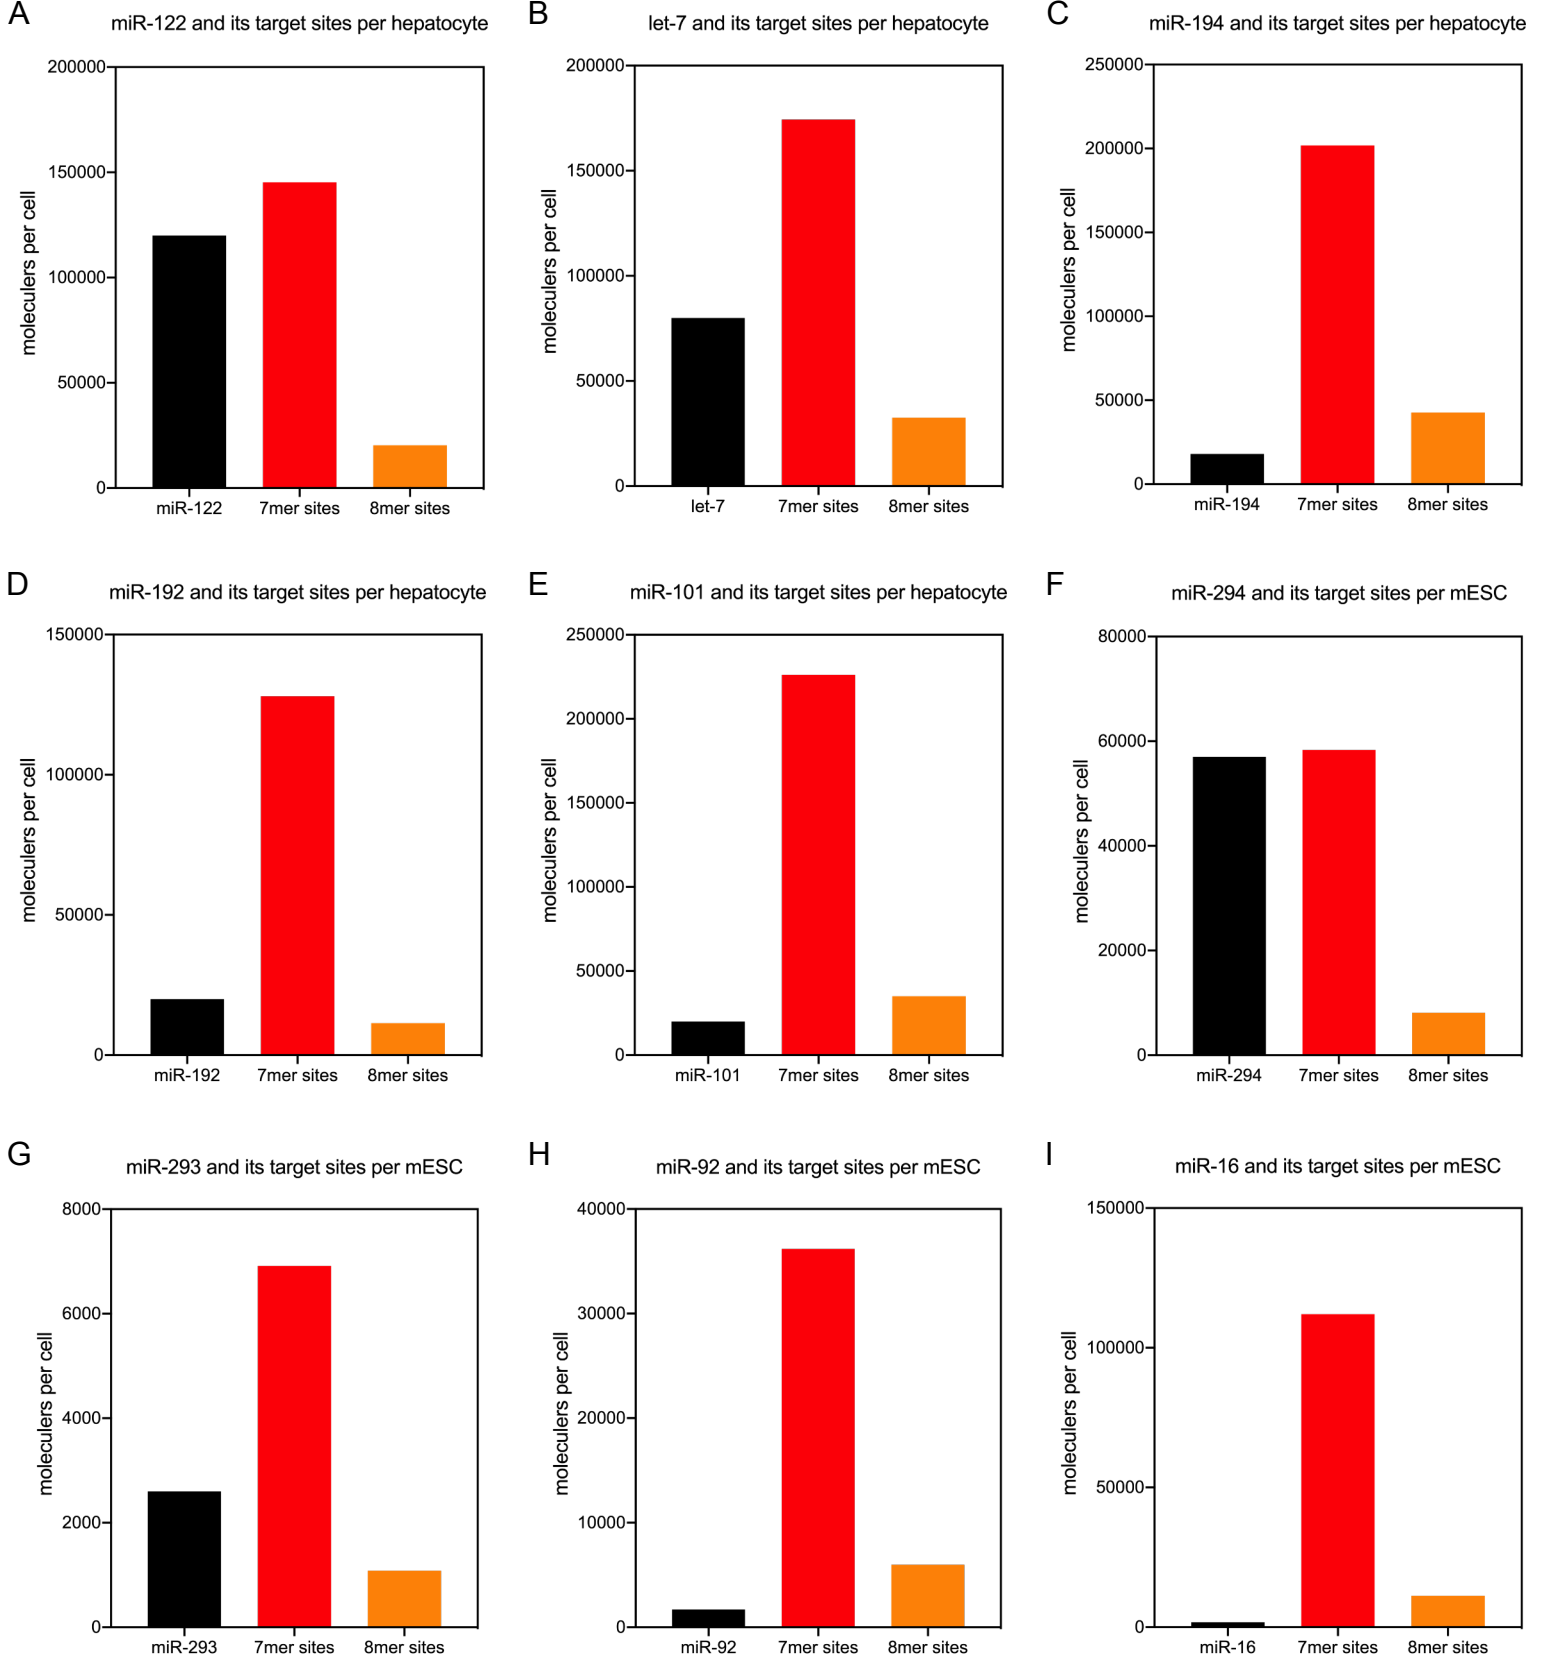

Fig. S7

Supplement: Supplemental_FigS7.pdf [file Supplemental_FigS7.pdf]
